# Supplementary material for: Modulation of the pharmacokinetics of zinc oxide nanoparticles and their fates in vivo
Source: Royal Society of Chemistry journal article supplement (doi:10.1039/c3nr02140h), 2013-01-01
Supplement: c3nr02140h.pdf [file c3nr02140h.pdf]

Supplementary figures

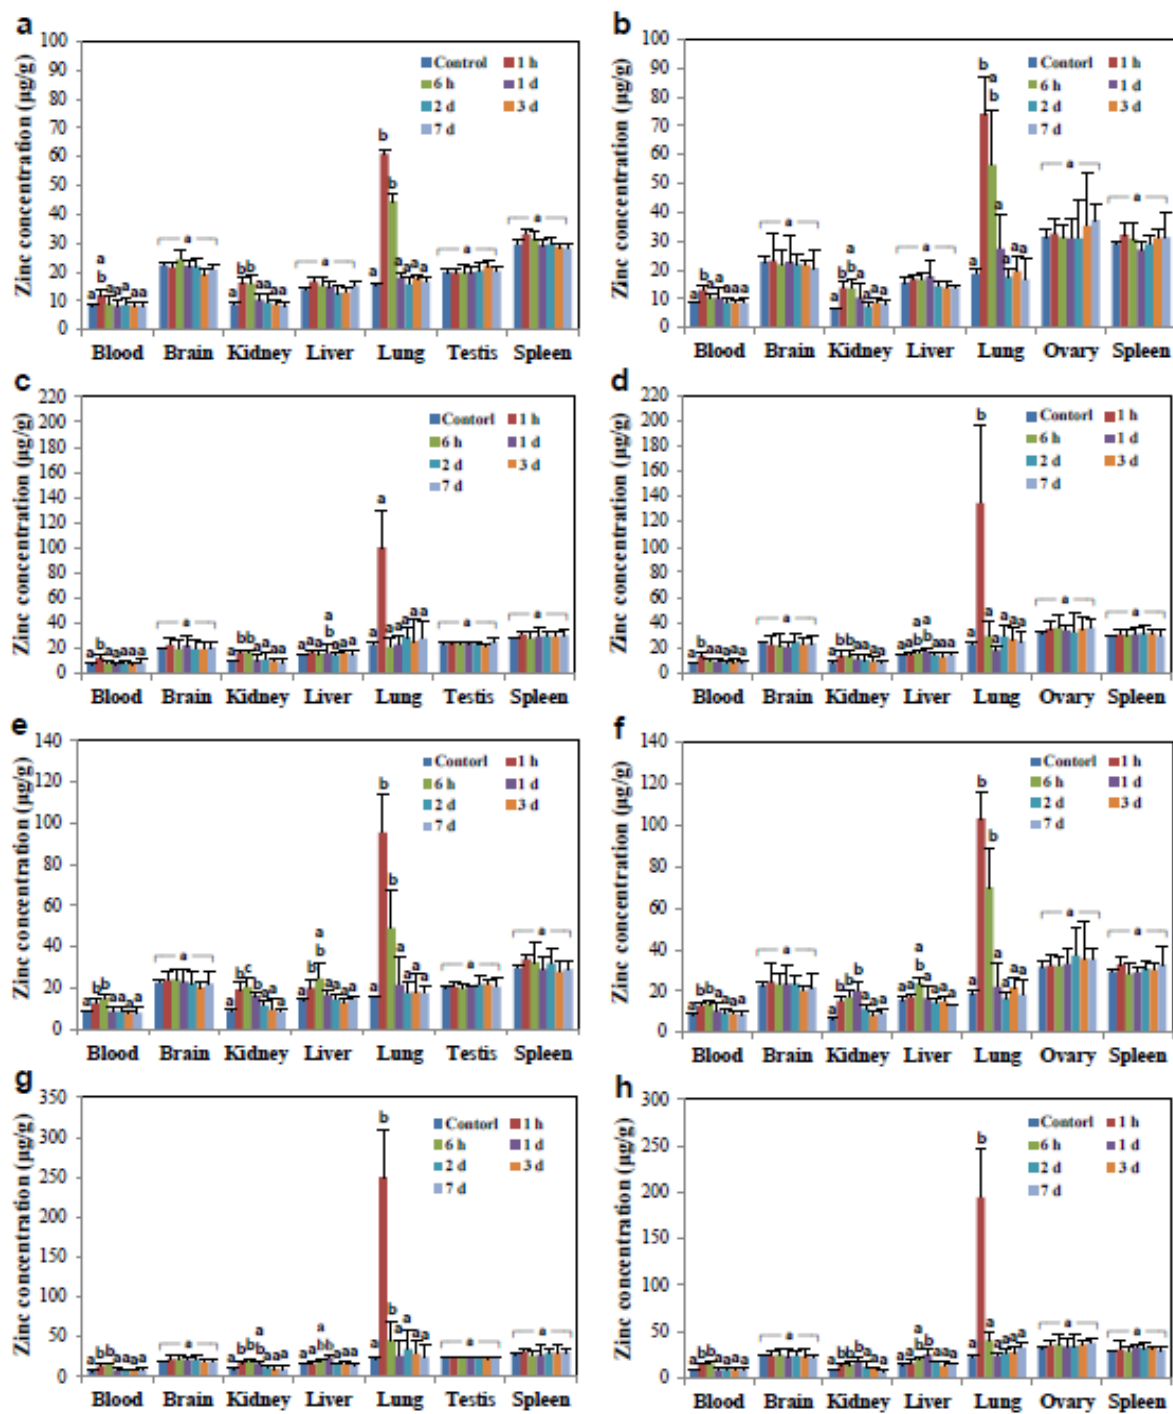

Supplementary Fig. 1. Tissue distribution of ZnO (+) nanoparticles in rats after the oral administration of 50 mg/kg (a-d) or 300 mg/kg (e-h) (a, e, 20 nm in males; b, f, 20 nm in females; c, g, 70 nm in males; d, h, 70 nm in females).
